# Supplementary material for: Consumers’ Perspectives on Circular Economy: Main Tendencies for Market Valorization
Source: MDPI journal article supplement (doi:10.3390/su151914292), 2023-09-27
Supplement: s1 [file s1]

Table S1. Global vision of the 84 articles analyzed for qualitative assessment.

| Article                                                                                                                                   | Authors                     | Year | Journal                                                           | Themes                                                                                | Level          | Term of Consumption     | Definition of Consumption                                                                                                                                                                                                             | Drivers                                                                                                                                                                                                    | Barriers                                                                                                                                                                                                  |
|-------------------------------------------------------------------------------------------------------------------------------------------|-----------------------------|------|-------------------------------------------------------------------|---------------------------------------------------------------------------------------|----------------|-------------------------|---------------------------------------------------------------------------------------------------------------------------------------------------------------------------------------------------------------------------------------|------------------------------------------------------------------------------------------------------------------------------------------------------------------------------------------------------------|-----------------------------------------------------------------------------------------------------------------------------------------------------------------------------------------------------------|
| Exploring Consumers' Motivations for Sustainable Consumption: A Self-Deterministic Approach                                               | Abdulrazak, S., Quoquab, F. | 2018 | Journal of International Consumer Marketing, (2018), 14-28, 30(1) | Sustainability; Sustainable consumption; Consumer behavior; Self-determination theory | Micro          | Sustainable consumption | The special focus of sustainable consumption is on the economic activity of choosing, using, and disposing of goods and services and how this can be changed to bring social and environmental benefit.                               | Emphasizing a sense of community to fosters sustainable consumption                                                                                                                                        | Failure to take into account the psychological aspects and benefits of consuming sustainably                                                                                                              |
| The subjective norms of sustainable consumption: A cross-cultural exploration                                                             | Minton, E., et al.          | 2018 | Journal of Business Research, (2018), 400-408, 82                 | Sustainable Consumption; Culture; Norms; Theory of reasoned action                    | Micro<br>Macro | Sustainable consumption | Sustainable consumption refers to consumers' sustainability-related attitudes and behaviors, such as recycling plastic, composting food scraps, using alternative modes of transportation, and buying an energy-efficient appliances. | Norms and institutions at the macro and micro levels.                                                                                                                                                      | Uncertainty avoidant behaviors.                                                                                                                                                                           |
| Consumer motivations for sustainable consumption: The interaction of gain, normative and hedonic motivations on electric vehicle adoption | Rezvani, Z., et al.         | 2018 | Business Strategy and the Environment, (2018), 1272-1283, 27(8)   | Sustainable consumption; Consumer behavior; norms; motivation                         | Micro          | Sustainable consumption | The purchase of sustainable products.                                                                                                                                                                                                 | Economic gains; Normative factors (personal and moral); Hedonistic motivations (positive anticipated emotions)                                                                                             | Lack of normative beliefs.                                                                                                                                                                                |
| Meanings and motives for consumers' sustainable actions in the food and clothing domains                                                  | Stancu, C., et al.          | 2020 | Sustainability (Switzerland), (2020), 1-25, 12(24)                | Motivations; Sustainable behavior; Self-determination                                 | Micro          | Sustainable behavior    | Sustainable behavior represents an action undertaken by consumers, which contributes towards fulfilling sustainable goals, regardless of whether its enactment was intended to serve that purpose or not.                             | External motivation (save money, better taste), introjected motivation (impress others, public self-consciousness), internalized motivation (reflection of self) and intrinsic motivation (pure interest). | High costs of purchasing sustainable products; fragmented overall understanding of the sustainability concept; lack of awareness and competence; Wrong positioning of sustainable products in the market. |

|                                                                                                                   |                       |      |                                                                   |                                                                                                      |             |                               |                                                                                                                                                                                    |                                                                                                                                                                                                                         |                                                                                                                                                                                                                                                                                                                                                                                   |
|-------------------------------------------------------------------------------------------------------------------|-----------------------|------|-------------------------------------------------------------------|------------------------------------------------------------------------------------------------------|-------------|-------------------------------|------------------------------------------------------------------------------------------------------------------------------------------------------------------------------------|-------------------------------------------------------------------------------------------------------------------------------------------------------------------------------------------------------------------------|-----------------------------------------------------------------------------------------------------------------------------------------------------------------------------------------------------------------------------------------------------------------------------------------------------------------------------------------------------------------------------------|
| How to SHIFT consumer behaviors to be more sustainable: A literature review and guiding framework                 | White, K., et al.     | 2019 | Journal of Marketing, (2019), 22-49, 83(3)                        | Sustainable consumer behavior; Corporate social responsibility                                       | Micro Meso  | Sustainable behavior          | Actions that result in decreases in adverse environmental impacts as well as decreased utilization of natural resources across the lifecycle of the product, behavior, or service. | Social influence, Habit formation, Individual self, Feelings and cognition, and Tangibility                                                                                                                             | Sustainable actions are viewed as effortful, time-consuming, or difficult to carry out; belief that sustainable attributes can have negative implications for aesthetics, functional performance, effort, or affordability.                                                                                                                                                       |
| Usustainable clothing: Challenges, barriers and interventions for encouraging more sustainable consumer behaviour | Harris, F., et al.    | 2016 | International Journal of Consumer Studies, (2016), 309-318, 40(3) | Sustainability; Behavior change                                                                      | Micro       | Sustainable Consumer Behavior | –                                                                                                                                                                                  | Construction of individual's social definition through their consumption choices; consumer-focused marketing; engagement with consumers; changing consumers' mindsets and habits.                                       | Lack of concern for the environment among consumers; limited knowledge about consumption's impact on the environment; negative attitudes towards sustainable clothing and demographic characteristics, as well as motivation, values, locus of control and perceived time and effort; price of sustainable clothing and also a lack of infrastructure. Social and cultural norms. |
| Antecedents of Environmentally and Socially Responsible Sustainable Consumer Behavior                             | Hosta, M., Zabkar, V. | 2021 | Journal of Business Ethics, (2021), 273-293, 171(2)               | Responsible consumer behavior; personal/social norms; ethical ideologies; theory of planned behavior | Micro Macro | Responsible Consumer Behavior | Involves a complex pattern of environmental and social issues, in line with the view of sustainability as a construct with both environmental and social pillar.                   | Socially responsible behavior is more influenced by perceived behavioral control and possibly social norms than environmentally responsible behavior, while information availability plays its role for both behaviors. | The complexity and struggles between doing what is good for environment and society.                                                                                                                                                                                                                                                                                              |

|                                                                                                                                                     |                            |      |                                                         |                                                                                        |                        |                               |                                                                                                                                                                                                                                                                   |                                                                                                                                                           |                                                                                                                                                                                                                                                                                                                |
|-----------------------------------------------------------------------------------------------------------------------------------------------------|----------------------------|------|---------------------------------------------------------|----------------------------------------------------------------------------------------|------------------------|-------------------------------|-------------------------------------------------------------------------------------------------------------------------------------------------------------------------------------------------------------------------------------------------------------------|-----------------------------------------------------------------------------------------------------------------------------------------------------------|----------------------------------------------------------------------------------------------------------------------------------------------------------------------------------------------------------------------------------------------------------------------------------------------------------------|
| Sustainable consumer behavior: A multilevel perspective                                                                                             | Milfont, T., Markowitz, E. | 2016 | Current Opinion in Psychology, (2016), 112-117, 10      | Empirical multilevel examination of consumption behavior.                              | Micro<br>Macro<br>Meso | Sustainable Consumer Behavior | Encompasses a wide range of behaviors, from consumer purchase of eco-friendly products to household and municipal water use patterns. It emerges at the intersection of individual- and contextual-level drivers of behavior                                      | Income, education level, general trust in other individuals, and post-materialist values.                                                                 | Multiple levels of decision-making and within the confines of broader contextual constraints and facilitators.                                                                                                                                                                                                 |
| Sustainable consumer behavior                                                                                                                       | Trudel, R.                 | 2018 | Consumer Psychology Review, (2018)                      | Sustainable consumer behavior; sustainability; prosocial behavior; decision-making     | Micro  <br>Macro       | Sustainable Consumer Behavior | Environmental or sustainable behavior is best defined by its impact: the extent to which decisions are driven with the intention to benefit or limit the impact on the environment                                                                                | Government incentives and nudges; Defaults in product design; Social and self-identification; Social influence and social norms; Product characteristics. | Cognitive barriers (myopia and present bias); Social proof and implicit recommendation                                                                                                                                                                                                                         |
| Barriers to access-based consumption in the circular transition: A systematic review                                                                | Arekrans, J. et al.        | 2022 | Resources, Conservation and Recycling, (2022), 184      | Access-based consumption; Sharing Economy; Collaborative consumption; Circular Economy | Micro<br>Macro<br>Meso | Access-based consumption      | Three variations of reuse models can be distinguished: (1) consumers buying used goods from other consumers; (2) consumers donating used goods to other consumers, and (3) consumers acquiring services instead of consuming products – access-based consumption. | Questioning of social norms; New regulations.                                                                                                             | Failure to meet consumers' expectations; low financial benefits; lack of trust; insufficient partnerships and cooperation among businesses; inappropriate product design; lack of support from governmental/regulatory system; Social norms not compatible; lack of knowledge/skills; presence of uncertainty. |
| Product Service Systems Users and Harley Davidson Riders: The Importance of Consumer Identity in the Diffusion of Sustainable Consumption Solutions | Catulli, M., et al.        | 2017 | Journal of Industrial Ecology, (2017), 1370-1379, 21(5) | Sustainable consumption; culture; brand communities                                    | Micro<br><br>Meso      | Sustainable consumption       | –                                                                                                                                                                                                                                                                 | Customization; Community belonging                                                                                                                        | –                                                                                                                                                                                                                                                                                                              |

|                                                                                                                           |                                    |      |                                                                                             |                                                                                          |       |                                    |                                                                                                                |                                                                                         |                                                                               |
|---------------------------------------------------------------------------------------------------------------------------|------------------------------------|------|---------------------------------------------------------------------------------------------|------------------------------------------------------------------------------------------|-------|------------------------------------|----------------------------------------------------------------------------------------------------------------|-----------------------------------------------------------------------------------------|-------------------------------------------------------------------------------|
| Access-Based Consumption: The Case of Car Sharing                                                                         | Bardhi, F., Eckhardt, G.           | 2012 | Journal of Consumer Research                                                                | Access-based consumption; Sharing Economy;                                               | Micro | Access-based consumption           | Transactions that can be market mediated but where no transfer of ownership takes place.                       | Sense of perceived ownership; consumer engagement                                       | Norms of negative reciprocity                                                 |
| Positive and Negative Antecedents of Purchasing Eco-friendly Products: A Comparison Between Green and Non-green Consumers | Barbarossa, C. , De Pelsmacker, P. | 2016 | Journal of Business Ethics, (2016), 229-247, 134(2)                                         | Eco-friendly products consumption; Intention-behavior gap; Self-identity                 | Micro | Eco-friendly Products' Consumption | Purchase of eco-friendly products.                                                                             | Care for the Environmental Consequences of Purchasing; Moral Obligation; Self-identity; | Perceived Personal Inconvenience of Purchasing environment-friendly products. |
| The circular economy and consumer behaviour: The mediating role of information seeking in buying circular packaging       | Testa, F., et al.                  | 2020 | Business Strategy and the Environment, (2020), 3435-3448, 29(8)                             | Circular economy; Environmental policy; green consumer behavior; sustainable consumption | Micro | Green consumption                  | –                                                                                                              | Environmental concern; product innovative and environmental features.                   | Greenwashing and level of knowledge.                                          |
| Ethically minded consumer behavior: Scale review, development, and validation                                             | Sudbury-Riley, L., Kohlbacher, F.  | 2016 | Journal of Business Research, (2016), 2697-2710, 69(8)                                      | Ethical Consumption; Attitude Behavior Gap; Consumer Ethics                              | Micro | Ethical consumption                | A variety of consumption choices pertaining to environmental issues and corporate social responsibility.       | –                                                                                       | –                                                                             |
| Do less ethical consumers denigrate more ethical consumers? The effect of willful ignorance on judgments of others        | Zane, D., et al.                   | 2016 | Journal of Consumer Psychology, (2016), 337-349, 26(3)                                      | Ethical Consumer Behavior; Sustainability; Social Comparison                             | Micro | Ethical consumption                | –                                                                                                              | –                                                                                       | –                                                                             |
| Peer-to-Peer Rental Markets in the Sharing Economy                                                                        | Fraiberger, S., Sundararajan, A.   | 2015 | SSRN                                                                                        | Sharing Economy                                                                          | Micro | Sharing Economy                    | Market-based trade between private individuals for a variety of assets and services                            | Economic effects; greater inclusion of low-income consumers                             | Sense of ownership.                                                           |
| The sharing economy: Why people participate in                                                                            | Hamari, J. et al.                  | 2016 | Journal of the Association for Information Science and Technology, (2016), 2047-2059, 67(9) | Collaborative Consumption; Sharing Economy;                                              | Micro | Collaborative Consumption          | The peer-to-peer-based activity of obtaining, giving, or sharing the access to goods and services, coordinated | Perceived sustainability, enjoyment of the activity as well as eco-nomic gains.         | –                                                                             |

|                                                                                                       |                            |      |                                                     |                                                                         |            |                 |                                                                                                                                                                                                                                                                                                                                                               |                                                                                                |                                             |
|-------------------------------------------------------------------------------------------------------|----------------------------|------|-----------------------------------------------------|-------------------------------------------------------------------------|------------|-----------------|---------------------------------------------------------------------------------------------------------------------------------------------------------------------------------------------------------------------------------------------------------------------------------------------------------------------------------------------------------------|------------------------------------------------------------------------------------------------|---------------------------------------------|
| collaborative consumption                                                                             |                            |      |                                                     | Attitude-Behavior Gap                                                   |            |                 | through community-based online services.                                                                                                                                                                                                                                                                                                                      |                                                                                                |                                             |
| Sharing economy versus collaborative consumption: What drives consumers in the new forms of exchange? | Minami, A., et al.         | 2021 | Journal of Business Research, (2021), 124-137, 128  | Sharing Economy; Collaborative Consumption; Consumer Behavior Intention | Micro      | Sharing Economy | Using and sharing products or services between two or more individuals with the support of the Web 2.0, and that does not involve any form of material compensation.                                                                                                                                                                                          | Convenience; Enjoyment; Social bonds and community; Environmental aspects; Behavior intention. | Lack of ownership; larger responsibility.   |
| The sharing economy: A pathway to sustainability or a nightmarish form of neoliberal capitalism?      | Martin, C.                 | 2016 | Ecological Economics, (2016), 149-159, 121          | Sharing Economy; Collaborative Consumption; Sustainability              | Micro      | Sharing Economy | Online peer-to-peer economic activities                                                                                                                                                                                                                                                                                                                       | Economic opportunities; decentralized and sustainable economy.                                 | Unregulated market.                         |
| Sharing economy revisited: Towards a new framework for understanding sharing models                   | Netter, S. et al.          | 2019 | Journal of Cleaner Production, (2019), 224-233, 221 | Sharing Economy; Collaborative Consumption; Business Models.            | Micro Meso | Sharing Economy | Encompasses a variety of different products and services that are distributed or accessed by sharing or through collaborative practices                                                                                                                                                                                                                       | Technological development and digital literacy; multi-sided sharing platforms.                 | —                                           |
| New Forms of Economies: Sharing Economy, Collaborative Consumption, Peer-to-Peer Economy              | Selloni, D.                | 2017 | Research for Development, (2017), 15-26             | Sharing Economy; Collaborative consumption                              | Micro Meso | Sharing Economy | A wide range of digital commercial or non-profit platforms facilitating exchanges amongst a variety of players through a variety of interaction modalities (P2P, P2B, B2P, B2B, G2G) that all broadly enable consumption or productive activities leveraging capital assets (money, real estate property, equipment, cars, etc.) goods, skills, or just time. | Technology; Environmental concerns; Global recession; Community                                | Lack of legal, fiscal and labor regulation. |
| The sustainability paradox of the sharing economy                                                     | Verboven, H., Vanherck, L. | 2016 | uwf UmweltWirtschaftsForum , (2016), 303-314, 24(4) | Sharing Economy; Sustainable Business Models; Rebound                   | Meso       | Sharing Economy | The sharing and selling of goods, services, space and money, usually on an online platform                                                                                                                                                                                                                                                                    | Increase of purchasing power; societal and environmental advantages                            | Highly competitive market.                  |

|                                                                                                                             |                       |      |                                                      |                                                                                      |               |                           | Effects;<br>Sustainability.                                                                                                                                                                                                                                                              |                                                                              |                                                                                     |
|-----------------------------------------------------------------------------------------------------------------------------|-----------------------|------|------------------------------------------------------|--------------------------------------------------------------------------------------|---------------|---------------------------|------------------------------------------------------------------------------------------------------------------------------------------------------------------------------------------------------------------------------------------------------------------------------------------|------------------------------------------------------------------------------|-------------------------------------------------------------------------------------|
| A triadic framework for collaborative consumption (CC): Motives, activities and resources & capabilities of actors          | Benoit, S. et al.     | 2017 | Journal of Business Research, (2017), 219-227, 79    | Collaborative Consumption; Consumer behavior.                                        | Micro<br>Meso | Collaborative Consumption | Triadic, between platform provider, peer service provider and costumer. No ownership transfer, shorter periods of consumption time. Mediated through market mechanisms.                                                                                                                  | Economic; Social; Hedonistic Value; Reduction of risks and responsibilities. | Risk of exclusion due to strong focus on technology; Exclusion of older population. |
| Contemporary collaborative consumption: An introduction                                                                     | Cruz, I., et al.      | 2018 | Contemporary Collaborative Consumption, (2018), 1-15 | Collaborative Consumption; Sharing                                                   | Macro         | Collaborative Consumption | Individuals and groups of consumers started rethinking ownership and the possibility of accessing rather than owning particular goods and commodities. Moreover, service provision has increasingly attracted modes of sharing rather than provisioning via a traditional market setting | Economic benefits                                                            | —                                                                                   |
| Facing the Challenge of Collaborative Consumption in Europe: A Time for Independent Metrics                                 | Gordo, A. et al.      | 2016 | Second International Workshop on the Sharing Economy | Collaborative Consumption; Sharing Economy.                                          | Macro         | Collaborative Consumption | Has its roots in new global ecological and environmental awareness movements, which came about due to the environmental degradation cause by production and consumption patterns                                                                                                         | Perception of economic and environmental benefits.                           | Disparities and inequalities.                                                       |
| The role of values in collaborative consumption: Insights from a product-service system for lending and borrowing in the UK | Piscicelli, L. et al. | 2015 | Journal of Cleaner Production, (2015), 21-29, 97     | Collaborative consumption; Pro-environmental behavior change; Social practice theory | Micro         | Collaborative Consumption | Collaborative consumption is an emerging socio-economic model based on sharing, renting, gifting, bartering, swapping, lending and borrowing. Made possible through community interaction and use of network technologies.                                                               | Moral and normative considerations                                           | Consumer values                                                                     |

|                                                                                                                    |                            |      |                                                                  |                                                       |            |                           |                                                                                                                                                                                                                                                                                                       |                                                          |                                                                |
|--------------------------------------------------------------------------------------------------------------------|----------------------------|------|------------------------------------------------------------------|-------------------------------------------------------|------------|---------------------------|-------------------------------------------------------------------------------------------------------------------------------------------------------------------------------------------------------------------------------------------------------------------------------------------------------|----------------------------------------------------------|----------------------------------------------------------------|
| Collaborative consumption, a buzzword that has gone conceptual: Three shades of the sharing economy                | Ertz, M.                   | 2020 | Oikonomics(Núm. 14, novembre de 2020                             | Collaborative Consumption; Sharing; Circular Economy. | Macro      | Collaborative Consumption | A set of resource circulation systems which enable consumers to both obtain and provide, temporarily or permanently, valuable resources or services through direct interaction with other consumers or through a mediator                                                                             | Critical mass; Authenticity                              | –                                                              |
| COLLABORATIVE CONSUMPTION: CONCEPTUAL SNAPSHOT AT A BUZZWORD                                                       | Ertz, M. et al.            | 2016 | Journal of Entrepreneurship Education, Volume 19, Number 2, 2016 | Collaborative Consumption; Sharing economy            | Macro      | Collaborative Consumption | The set of resource circulation systems which enable consumers to both obtain and provide, temporarily or permanently, valuable resources or services through direct interaction with other consumers or through a mediator.                                                                          | –                                                        | –                                                              |
| An economic review of the collaborative economy                                                                    | Petropoulos, G.            | 2017 | Policy Contribution Issue n°5   2017                             | Collaborative Economy; Collaborative Consumption      | Macro Meso | Collaborative Consumption | Matches people online who want to share assets and ser-vices                                                                                                                                                                                                                                          | Profit and remuneration                                  | Regulatory challenges and consumer information.                |
| Collaborative consumption: Determinants of satisfaction and the likelihood of using a sharing economy option again | Möhlmann, M.               | 2015 | Journal of Consumer Behaviour, (2015), 193-207, 14(3)            | Collaborative Consumption; Sharing Economy            | Micro Meso | Collaborative Consumption | Collaborative consumption, often associated with the sharing economy, takes place in organized systems or networks, in which participants conduct sharing activities in the form of renting, lending, trading, bartering, and swapping of goods, services, transportation solutions, space, or money. | Self-benefit; Profitable business concept; Large market  | –                                                              |
| Assessing the Gap between Technology and the Environmental Sustainability of European Cities                       | Akande, A. et al.          | 2019 | Information Systems Frontiers, (2019), 581-604, 21(3)            | Sustainable cities; Business Models                   | Meso       | –                         | –                                                                                                                                                                                                                                                                                                     | Need for environmentally-sustainable business practices. | Not all smart city concepts incorporate environmental aspects. |
| Understanding public environmental awareness and                                                                   | Almulhim, A., Abubakar, I. | 2021 | Sustainability (Switzerland), (2021), 13(18)                     | Circular economy; Policy; Attitudes;                  | Macro      | Green consumption         | –                                                                                                                                                                                                                                                                                                     | Socio-demographic factors                                | Socio-demographic factors                                      |

|                                                                                                                                                                                  |                             |      |                                                                 |                                                                                          |       |                         |   |                                                                                                                     |                                                                                                                                                                                                                |
|----------------------------------------------------------------------------------------------------------------------------------------------------------------------------------|-----------------------------|------|-----------------------------------------------------------------|------------------------------------------------------------------------------------------|-------|-------------------------|---|---------------------------------------------------------------------------------------------------------------------|----------------------------------------------------------------------------------------------------------------------------------------------------------------------------------------------------------------|
| attitudes toward circular economy transition in saudi arabia                                                                                                                     |                             |      |                                                                 | Sustainable development.                                                                 |       |                         |   |                                                                                                                     |                                                                                                                                                                                                                |
| Sustainable development and circular economy: The role of institutional promotion on circular consumption and market competitiveness from a multistakeholder engagement approach | Alonso-Almeida, M. et al.   | 2020 | Business Strategy and the Environment, (2020), 2803-2814, 29(6) | Circular economy; Circular consumption; Policy and institutions; Sustainable development | Macro | –                       | – | Coercive pressure by law is the main driver to force the adoption of something in the market; consumer information. | Lack of informationa bout CE and the benefits for consumers; difficulty of finding and understanding information about the characteristics of circular products; coercive pressure does not guarantee results. |
| Signaling the Green Sell: The Influence of Eco-Label Source, Argument Specificity, and Product Involvement on Consumer Trust                                                     | Atkinson, L., Rosenthal, S. | 2014 | Journal of Advertising, 43(1), 33–45                            | Green advertising; Consumer trust; Eco-labels                                            | Macro | –                       | – | Consumer engagement; internal motivations                                                                           | Situational factors                                                                                                                                                                                            |
| Institutions and Agency in the Sustainability of Day-to-Day Consumption Practices: An Institutional Ethnographic Study                                                           | Pekkanen, T.                | 2021 | Journal of Business Ethics, (2021), 241-260, 168(2)             | Sustainable Consumption; Intitutions; Informal institutions; Culture                     | Macro | Sustainable consumption | – | –                                                                                                                   | –                                                                                                                                                                                                              |
| Implementing regional circular economy policies: A proposed living constellation of stakeholders                                                                                 | Arsova, S. et al.           | 2021 | Sustainability (Switzerland), (2021), 13(9)                     | Regional circular economy; Stakeholders                                                  | Macro | –                       | – | Stakeholder engagement; Policy structure; Funding                                                                   | –                                                                                                                                                                                                              |
| Circular economy indicators as a supporting tool                                                                                                                                 | Avdiushchenko A., Zajaç, P. | 2019 | Sustainability (Switzerland), (2019), 11(11)                    | Circular Economy;                                                                        | Macro | –                       | – | –                                                                                                                   | –                                                                                                                                                                                                              |



|                                                                                                                                            |                              |      |                                                                                   |                                                          |            |                         |                                                                                                                                                                  |                                         |                                                                                                                   |
|--------------------------------------------------------------------------------------------------------------------------------------------|------------------------------|------|-----------------------------------------------------------------------------------|----------------------------------------------------------|------------|-------------------------|------------------------------------------------------------------------------------------------------------------------------------------------------------------|-----------------------------------------|-------------------------------------------------------------------------------------------------------------------|
| for European regional development policies                                                                                                 |                              |      |                                                                                   | Regional Development                                     |            |                         |                                                                                                                                                                  |                                         |                                                                                                                   |
| Socio-demographics, implicit attitudes, explicit attitudes, and sustainable consumption in supermarket shopping                            | Panzone, L. et al.           | 2016 | Journal of Economic Psychology, (2016), 77-95, 55                                 | Sustainable consumption; Implicit and explicit attitudes | Micro      | Sustainable consumption | –                                                                                                                                                                | Prices; environmental concerns          | Lack of knowledge and trust.                                                                                      |
| How circular is the circular economy? Analysing the implementation of circular economy in organisations                                    | Barreiro-Gen, M., Lozano, R. | 2020 | Business Strategy and the Environment, (2020), 3484-3494, 29(8)                   | Circular Economy; Organizations                          | Macro      | –                       | –                                                                                                                                                                | –                                       | –                                                                                                                 |
| You are what you can access: Sharing and collaborative consumption online                                                                  | Belk, R.                     | 2014 | Journal of Business Research, (2014), 1595-1600, 67(8)                            | Collaborative consumption; Sharing Economy; Community.   | Micro Meso | Sharing Economy         | Use of temporary access non-ownership models of utilizing consumer goods and services and reliance on the Internet, and especially Web 2.0, to bring this about. | ICTs                                    | –                                                                                                                 |
| A muddle of models of motivation for using peer-to-peer economy                                                                            | Bellotti, V. et al.          | 2015 | Conference on Human Factors in Computing Systems - Proceedings, (2015), 1085-1094 | Peer-to-peer economy                                     | Micro      |                         |                                                                                                                                                                  | Social influence and community building | Lack of promising opportunities for exchange, uncertainty about what to offer, and unfamiliarity with the service |
| Circular economy, degrowth and green growth as pathways for research on sustainable development goals: A global analysis and future agenda | Belmonte-Ureña, L. et al.    | 2021 | Ecological Economics, (2021), 185                                                 | Circular economy; Degrowth; Sustainability               | Macro      | –                       | –                                                                                                                                                                | –                                       | –                                                                                                                 |

|                                                                                                                                            |                        |      |                                                                      |                                                                                                                      |       |                         |                                                                                                                                                                                                                                                                                             |                                                             |                           |
|--------------------------------------------------------------------------------------------------------------------------------------------|------------------------|------|----------------------------------------------------------------------|----------------------------------------------------------------------------------------------------------------------|-------|-------------------------|---------------------------------------------------------------------------------------------------------------------------------------------------------------------------------------------------------------------------------------------------------------------------------------------|-------------------------------------------------------------|---------------------------|
| " Do as i say, not as i do" - a systematic literature review on the attitude-behaviour gap towards sustainable consumption of Generation y | Bernardes, J. et al.   | 2018 | IOP Conference Series: Materials Science and Engineering, (2018)     | Sustainable consumption; Intention-behavior gap                                                                      | Macro | Sustainable consumption | An improving pace of consumption that thrives to minimize the depletion of natural resources for future generations, by changing consumers' habits in their purchasing, use and recycling behavior.                                                                                         | Socio-demographic factors                                   | Socio-demographic factors |
| Re-introducing consumption to the 'circular economy': A sociotechnical analysis of domestic food provisioning                              | Mylan, J. et al.       | 2016 | Sustainability (Switzerland), (2016), 8(8)                           | Circular economy; Social practice                                                                                    | Micro | —                       | —                                                                                                                                                                                                                                                                                           | Individual behaviors and habits.                            | —                         |
| Transforming Business Models: Towards a Sufficiency-based Circular Economy                                                                 | Bocken, N., Short, S.  | 2020 | Handbook of the Circular Economy                                     | Circular business models; Sustainability                                                                             | Macro | —                       | —                                                                                                                                                                                                                                                                                           | —                                                           | Rebound effects.          |
| Sharing for people, planet or profit? Analysing motivations for intended sharing economy participation                                     | Böcker, L., Meelen, T. | 2017 | Environmental Innovation and Societal Transitions, (2017), 28-39, 23 | Sharing economy; Sustainable innovation; Sustainable consumption; collaborative consumption; environmental behaviour | Macro | Sharing Economy         | —                                                                                                                                                                                                                                                                                           | Economic factors; Environmental advantages; Social aspects. | Socio-demographic factors |
| Gender, generation and sustainable consumption: Exploring the behaviour of consumers from Izmir, Turkey                                    | Bulut, L. et al.       | 2017 | International Journal of Consumer Studies, (2017), 597-604, 41(6)    | Sustainable consumption behavior.                                                                                    | Macro | Sustainable consumption | The sustainable consumption concept which has been formed on development paradigm is mainly associated with the environmental context of sustainable development. Transformation of consumer behaviors and creating more sustainable products and services are the essences of that concept | Socio-demographic factors                                   | Socio-demographic factors |

|                                                                                                       |                            |      |                                                                    |                                                                                        |       |                         |                                                                                                                                                                                                             |                                                                                                                                                                                                             |                                                  |
|-------------------------------------------------------------------------------------------------------|----------------------------|------|--------------------------------------------------------------------|----------------------------------------------------------------------------------------|-------|-------------------------|-------------------------------------------------------------------------------------------------------------------------------------------------------------------------------------------------------------|-------------------------------------------------------------------------------------------------------------------------------------------------------------------------------------------------------------|--------------------------------------------------|
| The challenge of sustainable consumption for governance and policy development—a systematic review    | Byers, V., Gilmer, A.      | 2021 | Sustainability (Switzerland), (2021), 13(12)                       | Consumption; Sustainability; Governance                                                | Macro | —                       | —                                                                                                                                                                                                           | Political support; Social policies; Societal norms                                                                                                                                                          | Institutional inertia                            |
| Reclaiming Agency, Recovering Change? An Exploration of the Practice Theory of Theodore Schatzki      | Caldwell, R.               | 2012 | Journal for the Theory of Social Behaviour, (2012), 283-303, 42(3) | Practice Theory                                                                        | Macro | —                       | —                                                                                                                                                                                                           | —                                                                                                                                                                                                           | —                                                |
| Consumption in the circular economy: A literature review                                              | Camacho-Otero, J. et al.   | 2018 | Sustainability (Switzerland), (2018), 10(8)                        | Sustainable consumption; Circular economy; Sharing Economy; Collaborative Consumption. | Macro | Sustainable consumption | Sustainable consumption as a field of research investigates the relationship between consumption and sustainable development, and the roles that consumers and other stakeholders play in that relationship | Attitudes, values, beliefs, and the individual's sense of their own capability to perform the behavior; norms and habitual behavior; situational factors and their influence in activating different norms. | —                                                |
| Lost in translation: Exploring the ethical consumer intention-behavior gap                            | Carrington, M. et al.      | 2014 | Journal of Business Research, (2014), 2759-2767, 67(1)             | Ethical consumption; Intention-behavior gap                                            | Macro | Ethical consumption     | Consumers increasingly express concerns about the ethicality and impact of their consumption choices upon the environment, animals and/or society                                                           | Values; Lifestyle.                                                                                                                                                                                          | —                                                |
| Greenwash and Green Trust: The Mediation Effects of Green Consumer Confusion and Green Perceived Risk | Chen, Y., Chang, C.        | 2013 | Journal of Business Ethics, (2013), 489-500, 114(3)                | Greenwash; Green trust; Green consumer confusion                                       | Macro | —                       | —                                                                                                                                                                                                           | —                                                                                                                                                                                                           | Greenwashing; Lack of information disclosure     |
| Organizing Self-Organizing Systems: Toward                                                            | Chertow, M., Ehrenfeld, J. | 2012 | Journal of Industrial Ecology, (2012), 13-27, 16(1)                | Circular economy;                                                                      | Meso  |                         |                                                                                                                                                                                                             | Cost reduction; revenue enhancement;                                                                                                                                                                        | Lack of collective knowledge and social capital. |

|                                                                                                                             |                       |      |                                                         |                                                                  |       |   |   |                                                                                                                                                                                                |                                                     |
|-----------------------------------------------------------------------------------------------------------------------------|-----------------------|------|---------------------------------------------------------|------------------------------------------------------------------|-------|---|---|------------------------------------------------------------------------------------------------------------------------------------------------------------------------------------------------|-----------------------------------------------------|
| a Theory of Industrial Symbiosis                                                                                            |                       |      |                                                         | Industrial ecology                                               |       |   |   | business expansion.                                                                                                                                                                            |                                                     |
| Eco-design and Eco-materials: An interactive and collaborative approach                                                     | Cicconi, P.           | 2020 | Sustainable Materials and Technologies, (2020), 23      | Collaborative design; creative industry.                         | Macro | – | – | Stakeholder engagement; Collaboration.                                                                                                                                                         | –                                                   |
| Local governments' perspective on implementing the circular economy: A framework for future solutions                       | Dagilienè, L. et al.  | 2021 | Journal of Cleaner Production, (2021), 310              | Circular economy; Local governments                              | Macro | – | – | Collaboration between municipalities; collaboration between stakeholders.                                                                                                                      | Insufficient business environmental responsibility; |
| Smart circular product design strategies towards eco-effective production systems: A lean eco-design industry 4.0 framework | Dahmani, N. et al.    | 2021 | Journal of Cleaner Production, (2021), 320              | Circular business models; Circular Economy; Sustainable products | Meso  | – | – | –                                                                                                                                                                                              | Barriers between design and development.            |
| Supply chain management and the circular economy: towards the circular supply chain                                         | De Angelis, R. et al. | 2018 | Production Planning and Control, (2018), 425-437, 29(6) | Circular modes of production; Circular supply chain              | Meso  | – | – | Access to supply chain relationships; structural flexibility; closer collaboration within and beyond immediate industry boundaries and public and private procurement in the service industry. | Linear lock-in and geographical barriers.           |
| GetGreen Vietnam: towards more sustainable behaviour among the                                                              | De Koning, J. et al.  | 2016 | Journal of Cleaner Production                           | –                                                                | Macro | – | – | Sense of efficiency; Economic factors                                                                                                                                                          | Quality and regularity of alternatives.             |

|                                                                                                                               |                                  |      |                                                                |                                                              |       |                         |   |                                                                                                        |                                                                                                                                               |
|-------------------------------------------------------------------------------------------------------------------------------|----------------------------------|------|----------------------------------------------------------------|--------------------------------------------------------------|-------|-------------------------|---|--------------------------------------------------------------------------------------------------------|-----------------------------------------------------------------------------------------------------------------------------------------------|
| urban middle class                                                                                                            |                                  |      |                                                                |                                                              |       |                         |   |                                                                                                        |                                                                                                                                               |
| Transition Towards a Resource Efficient Circular Economy in Europe: Policy Lessons From the EU and the Member States          | Domenech, T., Bahn-Walkowiak, B. | 2019 | Ecological Economics, (2019), 7-19, 155                        | Circular Economy; Policy frameworks; policy mixes.           | Macro | –                       | – | Supply security; Competitiveness; Interaction between different levels of governance and stakeholders. | Higher liability.                                                                                                                             |
| Match Circular Economy and Urban Sustainability: Re-investigating Circular Economy Under Sustainable Development Goals (SDGs) | Dong, L. et al.                  | 2021 | Circular Economy and Sustainability, (2021), 243-256, 1(1)     | Circular economy; Urban sustainability                       | Macro | –                       | – | –                                                                                                      | Complexities generated by higher social diversity in cities.                                                                                  |
| Overcoming current challenges for circular economy assessment implementation in public sector organisations                   | Droege, H., et al.               | 2021 | Sustainability (Switzerland), (2021), 1-22, 13(3)              | Sustainable development; circular economy; public management | Macro | –                       | – | Political support; Skilled HR.                                                                         | No adequate CE assessment approach; Bureaucratic/political mindset; Lack of CE awareness; lack of leadership; Lack of stakeholder engagement. |
| Is the Circular Economy a New Fast-Expanding Market?                                                                          | Esposito, M. et al.              | 2017 | Thunderbird International Business Review, (2017), 9-14, 59(1) | Circular Economy                                             | Macro | –                       | – | –                                                                                                      | –                                                                                                                                             |
| What is consumption, where has it been going, and does it still matter?                                                       | Evans, D.                        | 2019 | Sociological Review, (2019), 499-517, 67(3)                    | Consumer culture; Sustainable consumption                    | Macro | Sustainable Consumption |   | –                                                                                                      | –                                                                                                                                             |

|                                                                                                                                            |                      |      |                                                               |                                                                           |                        |                         |   |                                                                                          |                                                                                                               |
|--------------------------------------------------------------------------------------------------------------------------------------------|----------------------|------|---------------------------------------------------------------|---------------------------------------------------------------------------|------------------------|-------------------------|---|------------------------------------------------------------------------------------------|---------------------------------------------------------------------------------------------------------------|
| Consumption in the circular economy: Learning from our mistakes                                                                            | Garcia, D. et al.    | 2021 | Sustainability (Switzerland), (2021), 1-23, 13(2)             | Circular economy; Sustainable consumption; intention-behavior gap.        | Macro                  | Sustainable consumption | – | –                                                                                        | Heterogeneity of consumption understandings; intention-behavior gap;                                          |
| A review on circular economy: The expected transition to a balanced interplay of environmental and economic systems                        | Ghiselini, P. et al. | 2016 | Journal of Cleaner Production, (2016), 11-32, 114             | Circular Economy                                                          | Macro<br>Meso<br>Micro | –                       | – | –                                                                                        | –                                                                                                             |
| Developing a sustainable food strategy for large organizations: The importance of context in shaping procurement and consumption practices | Goggins, G.          | 2018 | Business Strategy and the Environment, (2018), 838-848, 27(7) | Organizational culture; sustainable development; sustainable procurement. | Macro                  | –                       | – | Organizational support will legitimize particular modes of distribution and consumption. | Costs.                                                                                                        |
| What Do We Really Need? Questioning Consumption Through Sufficiency                                                                        | Gorge, H. et al.     | 2015 | Journal of Macromarketing, (2015), 11-22, 35(1)               | Sustainability; Sufficiency                                               | Macro                  | –                       | – | –                                                                                        | –                                                                                                             |
| Circular economy concept in the context of economic development in EU countries                                                            | Grdic, Z. et al.     | 2020 | Sustainability (Switzerland), (2020), 12(7)                   | Circular economy; Sustainable development                                 | Macro                  | –                       | – | –                                                                                        | –                                                                                                             |
| Socio-technical transitions and dynamics in everyday consumption practice                                                                  | Greene, M.           | 2018 | Global Environmental Change, (2018), 1-9, 52                  | Sustainable consumption; Everyday life                                    | Macro                  | Sustainable consumption | – | Information campaigns, green fees and taxes and other market-focused approaches          | Failure to appreciate the integral role of social and structural contexts in shaping and delimiting behavior. |

|                                                                                                   |                         |      |                                                                        |                                                                   |       |                  |                                                                                                                |                                                                                        |                                      |
|---------------------------------------------------------------------------------------------------|-------------------------|------|------------------------------------------------------------------------|-------------------------------------------------------------------|-------|------------------|----------------------------------------------------------------------------------------------------------------|----------------------------------------------------------------------------------------|--------------------------------------|
| Sustainable development goal disclosures: Do they support responsible consumption and production? | Gunawan, J. et al.      | 2020 | Journal of Cleaner Production, (2020), 246                             | Corporate responsibility; Responsible consumption and production. | Macro | –                | –                                                                                                              | Corporate responsibility.                                                              | –                                    |
| Policies for transitioning towards a circular economy: Expectations from the European Union (EU)  | Hartley, K. et al.      | 2020 | Resources, Conservation and Recycling, (2020), 155                     | Circular Economy; Public Policy                                   | Macro | –                | –                                                                                                              | Education; Financial incentives; Labelling.                                            | Need for policy mixes and synergies. |
| The Role of Institutions in Creating Circular Economy Pathways for Regional Development           | Henrysson, M., Nuur, C. | 2021 | Journal of Environment and Development, (2021), 149-171, 30(2)         | Circular Economy; Institutions                                    | Macro | –                | –                                                                                                              | Inherited social values.                                                               | Lack of a broad analysis             |
| Supply chain collaboration in industrial symbiosis networks                                       | Herczeg, G. et al.      | 2018 | Journal of Cleaner Production, (2018), 1058-1067, 171                  | Industrial symbiosis                                              | Meso  | –                | –                                                                                                              | Stakeholder engagement; Sharing of resource flows; cooperation with government bodies. | Restrictive laws.                    |
| Consumption Work in the circular economy: A research agenda.                                      | Hobson, K. et al.       | 2021 | Journal of Cleaner Production, (2021), 321                             | Circular Economy; Consumption work; Sharing Economy               | Micro | Consumption Work | Consumption Work refers to the labor integral to the purchase, use, re-use and disposal of goods and services. | Consumer's knowledge and intention; contextual factors; Institutions; Infrastructure   | –                                    |
| Remanufactured products purchase intentions and behaviour: Evidence from Malaysia                 | Khor, K., Hazen, B.     | 2017 | International Journal of Production Research, (2017), 2149-2162, 55(8) | Consumer behavior; Supply chain; closed loops                     | Micro | –                | –                                                                                                              | Attitudes and subjective norms.                                                        |                                      |
| After taste: Culture, consumption and                                                             | Warde, A.               | 2014 | Journal of Consumer Culture, (2014), 279-303, 14(3)                    | Consumption; Theories of practice                                 | Macro | –                | –                                                                                                              | Symbolic dimensions                                                                    | –                                    |

|                                                                                                                                              |                        |      |                                                           |                                       |       |                         |   |                                                                                               |                                                           |
|----------------------------------------------------------------------------------------------------------------------------------------------|------------------------|------|-----------------------------------------------------------|---------------------------------------|-------|-------------------------|---|-----------------------------------------------------------------------------------------------|-----------------------------------------------------------|
| theories of practice                                                                                                                         |                        |      |                                                           |                                       |       |                         |   |                                                                                               |                                                           |
| Entangled stakeholder roles and perceptions of sustainable consumption: An evaluation of sustainable consumption practices in Tianjin, China | Xu, S. et al.          | 2018 | Journal of Environmental Management, (2018), 841-848, 223 | Stakeholders; Sustainable consumption | Macro | Sustainable Consumption |   | Government and social marketing activities, education and tax structures, products, services. | ideological understanding, knowledge, economic conditions |
| The circular economy and consumer behaviour: Literature review and research directions                                                       | Vidal-Ayuso, F. et al. | 2023 | Journal of Cleaner Production, (2023), 418                | Circular economy; Consumer behavior   | Micro | –                       | – | Perceived value and quality; Innovation                                                       | –                                                         |
| Public Policy and Behavior Change                                                                                                            | Tummers, L.            | 2019 | Public Administration Review, (2019), 925-930, 79(6)      | Public policy; institutions           | Macro | –                       | – | Support from stakeholders                                                                     | Context-dependency.                                       |
| Consumer perception of the circular economy concept applied to the food domain: An exploratory approach                                      | Sousa, P.              | 2021 | Sustainability (Switzerland), (2021), 13(20)              | Circular Economy; Consumers           | Micro | –                       | – | Environmental concern; Sociodemographic factors.                                              | –                                                         |
| Quietly does it: Questioning assumptions about class, sustainability and consumption                                                         | Smith, J. et al.       | 2015 | Geoforum, (2015), 223-232, 67                             | Sustainability; Ethical consumption   | Micro | Ethical consumption     | – | Matters of class and sociodemographic factors.                                                | –                                                         |
| Practising circles: Studying institutional change and circular economy practices                                                             | Schulz, C. et al.      | 2019 | Journal of Cleaner Production, (2019), 237                | Circular Economy; Institutions        | Macro | –                       | – | Routines, norms and value systems.                                                            | –                                                         |
| Ecolabels and the attitude–behavior relationship                                                                                             | Riskos, K. et al.      | 2021 | Sustainability (Switzerland), (2021), 13(12)              | Green marketing; Eco-labels           | Micro | –                       | – | –                                                                                             | –                                                         |



towards green  
product  
purchase: A  
multiple  
mediation model
